# Supplementary material for: Bipartite consensus of MASs with Markov switching topologies under fractional Brownian motion via dynamic ETS
Source: Research Square preprint supplement (doi:10.21203/rs.3.rs-8441364/v1), 2026-01-16
Supplement: Supplementary file 1 [file 644d921f5c3e37eb942e71bc.docx]

Highlights

1. The consensus of MASs studied in the paper is bipartite consensus in the mean-square sense. There exist both competitive and cooperative relationships among the agents, and the state variables eventually converge to two states with identical magnitude but opposite signs. However, most existing literature on MASs consensus considers only cooperative relationships without competitive interactions among agents, where the agents' states ultimately converge to an identical state.
2. The noise in the paper is modeled as FBM, with the Hurst index modeled as , rather than as standard Brownian motion. Due to the open nature of the communication topologies among MASs, network attacks are difficult to avoid, these attacks are modeled as deception attacks characterized by strong concealment and ease of implementation.
3. Due to the influence of FBM noise and deception attacks, the communication topologies of the MASs undergoes random alterations. Fixed communication topologies cannot accurately describe such random changes, thus, the paper models them as MSTs, assuming that the transition rates of the Markov chain are partially or completely unknown.
4. An internal dynamic variable is introduced, an intelligent, flexible, low-frequency-triggering, and high-performance ETS is designed, and a controller related to the event-triggering instants is constructed.
